# Supplementary material for: Readability of Commonly Used Quality of Life Outcome Measures for Youth Self-Report
Source: MDPI journal article supplement (doi:10.3390/ijerph19159555), 2022-08-03
Supplement: s1 [file s1]

# Readability of Commonly Used Quality of Life Outcome Measures for Youth Self-Report

Karolin R. Krause , Jenna Jacob \*, Peter Szatmari and Daniel Hayes

## Supplement File S2: Text Characteristics and Readability of Demographic Question Sets

**Table S2. Text Characteristics and Readability of Demographic Question Sets**

| Measure                                                       | Ages        | Length   | Citations | Text Characteristics |       |           |                     |                 |                              | Items |      |      |     |      |      |
|---------------------------------------------------------------|-------------|----------|-----------|----------------------|-------|-----------|---------------------|-----------------|------------------------------|-------|------|------|-----|------|------|
|                                                               |             |          |           | Letters              | Words | Sentences | Av. Sentence Length | Av. Word Length | Difficult Words <sup>a</sup> | CLI   | DC   | FK   | FOG | FCST | Mean |
| KINDL <sup>R</sup> – <i>Kid-KINDL</i> <sup>R</sup> [47, 48]   | 7-13 years  | 24 items | 1218      | 64                   | 21    | 4         | 5.3                 | 3.0             | 14%                          | N/A   | 10.2 | 4.4  | 7.1 | 11.4 | 8.3  |
| KINDL <sup>R</sup> – <i>Kiddo-KINDL</i> <sup>R</sup> [47, 48] | 14-17 years | 24 items | 1218      | 64                   | 21    | 4         | 5.3                 | 3.0             | 14%                          | N/A   | 10.2 | 4.4  | 7.1 | 11.4 | 8.3  |
| YQOL – <i>YQOL-R</i> [54]                                     | 11-18 years | 57 items | 282       | 531                  | 123   | 22        | 5.6                 | 4.3             | 11%                          | 9.3   | 9.9  | 10.5 | 7.6 | 13.5 | 10.2 |
| YQOL – <i>YQOL-SF</i> [54]                                    | 11-18 years | 16 items | 282       | 348                  | 80    | 14        | 5.7                 | 4.4             | 10%                          | 9.6   | 9.8  | 10.6 | 8.3 | 13.8 | 11.4 |
| Overall mean                                                  |             |          |           | 251.8                | 61.3  | 11        | 5.5                 | 3.7             | 12.3                         | 9.5   | 7.5  | 6.4  | 6.8 | 12.5 | 9.55 |

*Note:* KINDL<sup>R</sup>: KINDer Lebensqualitätsfragebogen; YQOL: Youth Quality of Life Instrument; YQOL-R: Youth Quality of Life Instrument – Research Version; YQOL-SF: Youth Quality of Life Instrument – Short Form; SF15: Short Form 15.
