# Supplementary material for: Readability of Commonly Used Quality of Life Outcome Measures for Youth Self-Report
Source: MDPI journal article supplement (doi:10.3390/ijerph19159555), 2022-08-03
Supplement: s1 [file s1]

# **Readability of Commonly Used Quality of Life Outcome Measures for Youth Self-Report**

**Karolin R. Krause , Jenna Jacob \*, Peter Szatmari and Daniel Hayes**

**Supplement File S1:  
Text Characteristics of the Included QOL Measures**

**Table S1. Text Characteristics of the Included QOL Measures**

| Measure                                             | Ages        | Length   | Instructions      |                  |                |                           |                       |                                 | Items              |                  |                |                           |                       |                                 |
|-----------------------------------------------------|-------------|----------|-------------------|------------------|----------------|---------------------------|-----------------------|---------------------------------|--------------------|------------------|----------------|---------------------------|-----------------------|---------------------------------|
|                                                     |             |          | Letters           | Words            | Sentences      | Av.<br>Sentence<br>Length | Av.<br>Word<br>Length | Difficult<br>Words <sup>a</sup> | Letters            | Words            | Sentences      | Av.<br>Sentence<br>Length | Av.<br>Word<br>Length | Difficult<br>Words <sup>a</sup> |
| AQOL-6D Adolescent Instrument                       | 12-18 years | 20 items | 363               | 73               | 4              | 18.3                      | 5.0                   | 25%                             | 4430               | 1000             | 123            | 8.1                       | 4.5                   | 18%                             |
| CHU-9D                                              | 7-17 years  | 9 items  | 369               | 95               | 11             | 8.6                       | 3.9                   | 3%                              | 1478               | 363              | 53             | 6.8                       | 4.1                   | 17%                             |
| EQ-5D-Y                                             | 8-15 years  | 6 items  | 293               | 77               | 7              | 11.0                      | 3.9                   | 14%                             | 697                | 155              | 22             | 7.0                       | 4.5                   | 19%                             |
| KIDSCREEN – <i>KIDSCREEN-52</i>                     | 8-18 years  | 52 items | 447               | 109              | 11             | 9.9                       | 4.1                   | 5%                              | 2203               | 527              | 61             | 8.6                       | 4.2                   | 9%                              |
| KIDSCREEN – <i>KIDSCREEN-27</i>                     | 8-18 years  | 27 items | 447               | 109              | 11             | 9.9                       | 4.1                   | 5%                              | 1177               | 287              | 30             | 9.6                       | 4.1                   | 10%                             |
| KIDSCREEN – <i>KIDSCREEN-10</i>                     | 8-18 years  | 10 items | 447               | 109              | 11             | 9.9                       | 4.1                   | 5%                              | 350                | 89               | 12             | 7.4                       | 3.9                   | 4%                              |
| KINDL <sup>R</sup> – <i>Kid-KINDL<sup>R</sup></i>   | 7-13 years  | 24 items | 693               | 165              | 18             | 9.2                       | 4.2                   | 6%                              | 656                | 173              | 25             | 6.9                       | 3.8                   | 12%                             |
| KINDL <sup>R</sup> – <i>Kiddo-KINDL<sup>R</sup></i> | 14-17 years | 24 items | 739               | 176              | 19             | 9.3                       | 4.2                   | 6%                              | 633                | 169              | 24             | 7.0                       | 3.7                   | 12%                             |
| PedsQL 4.0 <i>Generic Core Scales – Child</i>       | 8-12 years  | 23 items | 320               | 91               | 8              | 11.4                      | 3.6                   | 14%                             | 805                | 218              | 29             | 7.5                       | 3.7                   | 8%                              |
| PedsQL 4.0 <i>SF15 Generic Core Scales – Child</i>  | 8-12 years  | 15 items | 320               | 91               | 8              | 11.4                      | 3.6                   | 14%                             | 577                | 154              | 21             | 7.3                       | 3.7                   | 10%                             |
| PedsQL 4.0 <i>Generic Core Scales – Teen</i>        | 13-18 years | 23 items | 320               | 91               | 8              | 11.4                      | 3.6                   | 14%                             | 797                | 215              | 29             | 7.4                       | 3.7                   | 10%                             |
| PedsQL 4.0 <i>SF15 Generic Core Scales – Teen</i>   | 13-18 years | 15 items | 320               | 91               | 8              | 11.4                      | 3.6                   | 14%                             | 580                | 154              | 21             | 7.3                       | 3.8                   | 12%                             |
| PQ-LES-Q                                            | 6-17 years  | 15 items | –                 | –                | –              | –                         | –                     | –                               | 309                | 65               | 14             | 4.6                       | 4.75                  | 9%                              |
| PROMIS Global Health 7                              | 8-17 years  | 7 items  | 80                | 17               | 2              | 8.5                       | 4.8                   | 41%                             | 344                | 80               | 7              | 11.4                      | 4.3                   | 10%                             |
| PROMIS Global Health 7 +2                           | 8-17 years  | 9 items  | 80                | 17               | 2              | 8.5                       | 4.8                   | 41%                             | 404                | 98               | 9              | 10.9                      | 4.13                  | 11%                             |
| QOLP-AV                                             | 14-20 years | 72 items | 5327              | 1253             | 82             | 15.3                      | 4.3                   | 24%                             | 4319               | 949              | 172            | 5.5                       | 4.6                   | 24%                             |
| TACQOL                                              | 8-15 years  | 63 items | 846               | 199              | 18             | 11.1                      | 4.3                   | 11%                             | 2288               | 473              | 73             | 6.5                       | 4.8                   | 22%                             |
| YQOL – <i>YQOL-R</i>                                | 11-18 years | 57 items | 1270              | 270              | 23             | 11.7                      | 4.7                   | 14%                             | 3777               | 891              | 71             | 12.5                      | 4.3                   | 9%                              |
| YQOL – <i>YQOL-SF</i>                               | 11-18 years | 16 items | 1004              | 216              | 18             | 12.0                      | 4.6                   | 14%                             | 860                | 205              | 16             | 12.8                      | 4.2                   | 8%                              |
| 16D                                                 | 12-15 years | 16 items | 192               | 43               | 4              | 10.8                      | 4.5                   | 12%                             | 4399               | 1024             | 100            | 10.2                      | 4.3                   | 26%                             |
| 17D                                                 | 8-11 years  | 17 items | 160               | 35               | 4              | 8.8                       | 4.6                   | 9%                              | 3945               | 970              | 121            | 8.0                       | 4.1                   | 12%                             |
| Overall mean<br>(SD)                                |             |          | 701.9<br>(1131.5) | 166.4<br>(264.2) | 13.9<br>(17.2) | 10.9<br>(2.4)             | 4.2<br>(0.4)          | 15%<br>(10.8)                   | 1668.0<br>(1536.2) | 393.3<br>(349.7) | 49.2<br>(45.5) | 8.3<br>(2.2)              | 4.1<br>(0.3)          | 13%<br>(5.8)                    |

*Note:* AQOL-6D: Assessment of Quality of Life; CHU-9D: Child Health Utility Index 9D; EQ-5D-Y: EuroQol Five Dimensions Health for Youth; KINDL<sup>R</sup>: KINDer Lebensqualitätsfragebogen; PedsQL 4.0: Pediatric Quality of Life Inventory Generic Core Scales; PQ-LES-Q: The Pediatric Quality of Life Enjoyment and Satisfaction Questionnaire; PROMIS: the Patient Reported Outcomes Measurement Information System; QOLP-AV: Quality of Life Profile - Adolescent Version; TACQOL: TNO AZL Children's Quality of Life; YQOL: Youth Quality of Life Instrument; YQOL-R: Youth Quality of Life Instrument – Research Version; YQOL-SF: Youth Quality of Life Instrument – Short Form; SF15: Short Form 15.

<sup>a</sup> Percentage of difficult vocabulary as indicated by the Dale-Chall formula in R KoRpus.
